# Supplementary material
Source: Royal Society of Chemistry journal article supplement (doi:10.1039/d6ja00010j)
Supplement: d6ja00010j1.pdf [file d6ja00010j1.pdf]

## Supporting Information for

### M6, a monazite reference material for fission-track thermochronology

Jianzhang Pang<sup>a\*</sup>, Yan Ma<sup>a</sup>, Dewen Zheng<sup>a</sup>, Weixing Li<sup>b</sup>, Zhiyong Zhang<sup>c</sup>, Jing Yang<sup>d</sup>, Huiping Zhang<sup>a</sup>, Ying Wang<sup>a</sup>, Xi Ma<sup>a</sup>, Jingxing Yu<sup>a</sup>, Yizhou Wang<sup>a</sup>, Chaopeng Li<sup>a</sup>

<sup>a</sup> State Key Laboratory of Earthquake Dynamics and Forecasting, Institute of Geology, China Earthquake Administration, Beijing 100029, China

<sup>b</sup> State Key Laboratory of Tibetan Plateau Earth System Science, Resources and Environment (TPESRE), Institute of Tibetan Plateau Research, Chinese Academy of Sciences, Beijing 100101, China

<sup>c</sup> State Key Laboratory of Lithospheric Evolution, Institute of Geology and Geophysics, Chinese Academy of Sciences, Beijing 100029, China

<sup>d</sup> Key Laboratory of Active Tectonics and Geological Safety, Ministry of Natural Resources, Institute of Geomechanics, Chinese Academy of Geological Sciences, Beijing 100081, China

### Contents of this file

Figures S1 to S2

Additional Supporting Information (Files uploaded separately)

Tables S1, S2, and S3

Table S1: Chemical composition of M6 by EMP and Raman spectrum data;

Table S2: U and Th concentrations of monazite M6 analyzed by LA-ICP-MS;

Table S3: Fission-track ages for monazite M6 from IGCEA-FT lab, CAGS-FT lab and CAS-FT lab.

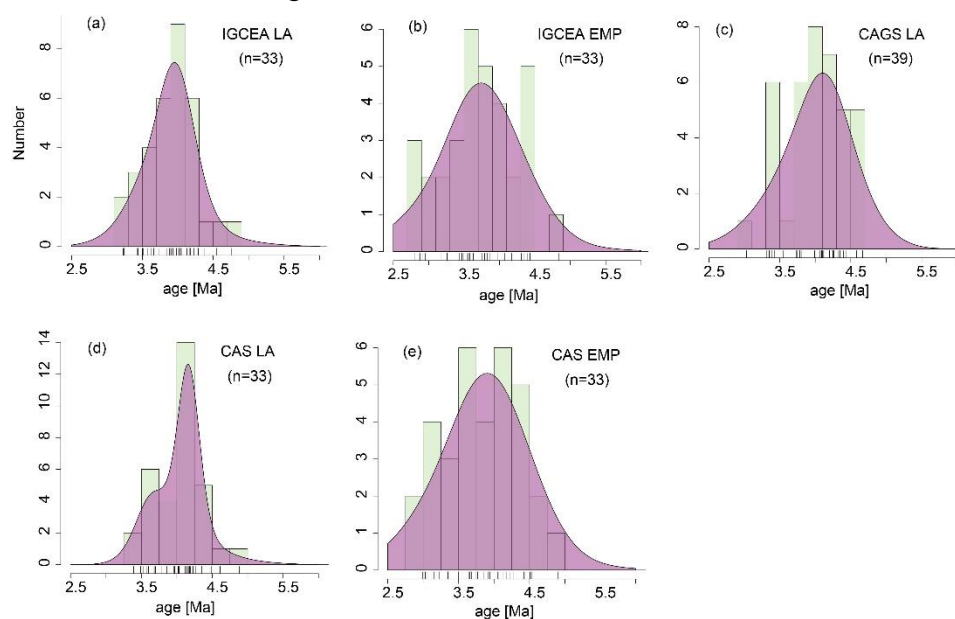

Fig S1. Spot FT ages distribution of monazite M6.

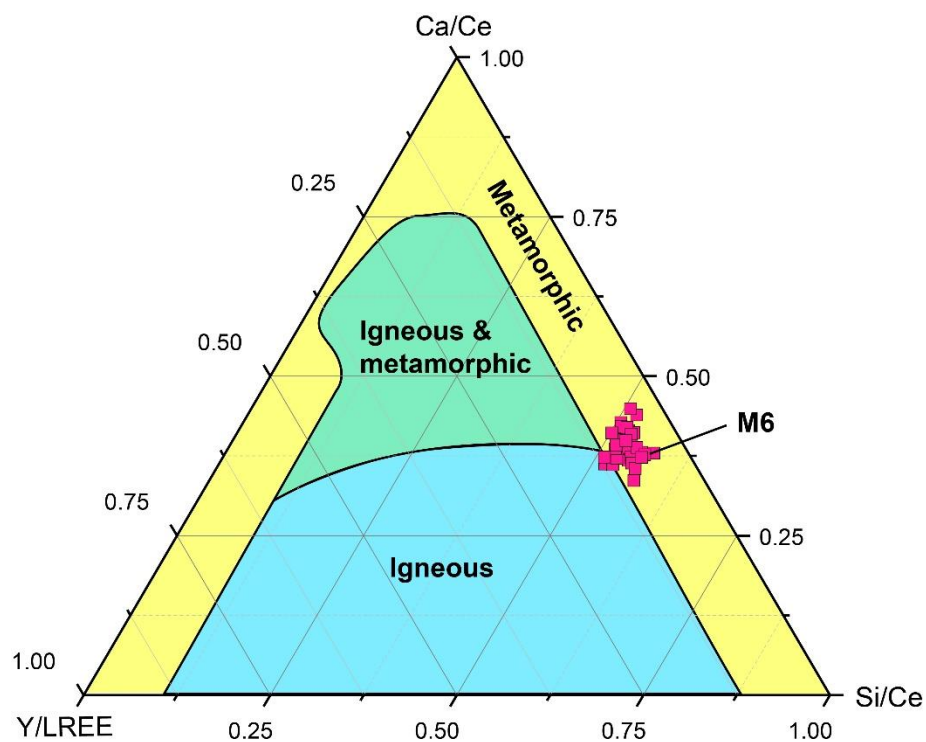

Fig S2. Ternary diagram of monazite end-members: cheralite, huttonite, and monazite (modified after Foster and Harlov., 1999; Wu et al., 2019). The integrated data are from the literature (Supplementary Table S1).

## Reference

- Förster, H., and D. E. Harlov (1999), Monazite-(Ce)-huttonite solid solutions in granulite-facies metabasites from the Ivrea-Verbano Zone, Italy, *Mineralogical Magazine*, 63, 587 - 594.
- Wu, L.-G., X.-H. Li, X.-X. Ling, Y.-H. Yang, C.-F. Li, Y.-L. Li, Q. Mao, Q.-L. Li, and B. Putlitz (2019), Further Characterization of the RW-1 Monazite: A New Working Reference Material for Oxygen and Neodymium Isotopic Microanalysis, *Minerals*, 9(10), 583.



**Table S2. U and Th concentrations of monazite M6 analyzed by LA-ICP-MS**

| IGCEA-FT lab |                              |            |                                        |            | CAGS-FT lab |                              |            |                                        |            |
|--------------|------------------------------|------------|----------------------------------------|------------|-------------|------------------------------|------------|----------------------------------------|------------|
| Sample No    | [ <sup>232</sup> Th]<br>wt % | 2 $\sigma$ | [ <sup>238</sup> U]<br>$\mu\text{g/g}$ | 2 $\sigma$ | Sample No   | [ <sup>232</sup> Th]<br>wt % | 2 $\sigma$ | [ <sup>238</sup> U]<br>$\mu\text{g/g}$ | 2 $\sigma$ |
| M6-3-1       | 10.51                        | 0.24       | 3709                                   | 59         | M6-11-1     | 11.51                        | 0.22       | 3864                                   | 61         |
| M6-3-2       | 10.52                        | 0.22       | 3709                                   | 49         | M6-11-2     | 11.39                        | 0.17       | 3812                                   | 59         |
| M6-3-3       | 10.68                        | 0.26       | 3781                                   | 54         | M6-11-3     | 11.34                        | 0.21       | 3862                                   | 64         |
| M6-3-4       | 10.7                         | 0.24       | 3751                                   | 56         | M6-11-4     | 11.46                        | 0.17       | 3890                                   | 68         |
| M6-3-5       | 10.56                        | 0.23       | 3715                                   | 50         | M6-11-5     | 11.34                        | 0.22       | 3828                                   | 57         |
| M6-4-1       | 10.53                        | 0.21       | 3406                                   | 49         | M6-11-6     | 11.38                        | 0.17       | 3891                                   | 64         |
| M6-4-2       | 10.57                        | 0.24       | 3440                                   | 51         | M6-11-7     | 11.54                        | 0.22       | 3886                                   | 63         |
| M6-4-3       | 10.73                        | 0.25       | 3410                                   | 50         | M6-11-8     | 11.49                        | 0.17       | 3899                                   | 58         |
| M6-4-4       | 10.44                        | 0.24       | 3398                                   | 50         | M6-11-9     | 11.58                        | 0.22       | 3894                                   | 73         |
| M6-4-5       | 10.61                        | 0.23       | 3394                                   | 43         | M6-11-10    | 11.39                        | 0.18       | 3818                                   | 59         |
| M6-5-1       | 9.87                         | 0.25       | 3549                                   | 52         | M6-11-11    | 11.46                        | 0.2        | 3889                                   | 61         |
| M6-5-2       | 10.04                        | 0.23       | 3590                                   | 57         | M6-11-12    | 11.66                        | 0.19       | 3911                                   | 55         |
| M6-5-3       | 10.16                        | 0.23       | 3568                                   | 52         | M6-11-13    | 11.48                        | 0.2        | 3923                                   | 57         |
| M6-5-4       | 10.15                        | 0.21       | 3495                                   | 55         | M6-11-14    | 11.75                        | 0.2        | 3906                                   | 69         |
| M6-5-5       | 10.21                        | 0.23       | 3520                                   | 48         | M6-11-15    | 11.63                        | 0.21       | 3909                                   | 67         |
| M6-6-1       | 11.72                        | 0.23       | 4340                                   | 59         | M6-11-16    | 11.47                        | 0.27       | 3827                                   | 70         |
| M6-6-2       | 11.59                        | 0.22       | 4278                                   | 58         | M6-11-17    | 11.39                        | 0.28       | 3802                                   | 72         |
| M6-6-3       | 11.1                         | 0.24       | 3939                                   | 51         | M6-11-18    | 11.33                        | 0.19       | 3865                                   | 71         |
| M6-6-4       | 10.83                        | 0.24       | 3859                                   | 59         | M6-11-19    | 11.72                        | 0.22       | 3856                                   | 69         |
| M6-6-5       | 11.33                        | 0.27       | 4111                                   | 65         | M6-11-20    | 11.33                        | 0.24       | 3791                                   | 65         |
| M6-6-6       | 11.32                        | 0.24       | 4050                                   | 54         | M6-12-1     | 9.49                         | 0.31       | 3460                                   | 110        |
| M6-7-1       | 11.66                        | 0.25       | 4312                                   | 59         | M6-12-2     | 9.85                         | 0.15       | 3680                                   | 69         |
| M6-7-2       | 11.2                         | 0.23       | 4266                                   | 64         | M6-12-3     | 10.05                        | 0.21       | 3760                                   | 74         |
| M6-7-3       | 11.55                        | 0.23       | 4357                                   | 56         | M6-12-4     | 10.27                        | 0.24       | 3683                                   | 87         |
| M6-7-4       | 11.49                        | 0.2        | 4332                                   | 56         | M6-12-5     | 10.23                        | 0.18       | 3644                                   | 62         |
| M6-8-1       | 11.22                        | 0.22       | 3697                                   | 40         | M6-12-6     | 9.96                         | 0.17       | 3656                                   | 58         |
| M6-8-2       | 11.74                        | 0.29       | 3805                                   | 48         | M6-12-7     | 9.92                         | 0.26       | 3562                                   | 86         |
| M6-8-3       | 11.57                        | 0.27       | 3732                                   | 55         | M6-12-8     | 10.26                        | 0.22       | 3800                                   | 100        |
| M6-8-4       | 11.23                        | 0.27       | 3663                                   | 46         | M6-12-9     | 10.71                        | 0.52       | 3840                                   | 120        |
| M6-9-1       | 11.49                        | 0.28       | 4183                                   | 66         | M6-12-10    | 10.42                        | 0.65       | 3650                                   | 170        |
| M6-9-2       | 11.73                        | 0.3        | 4244                                   | 78         | M6-12-11    | 10.22                        | 0.18       | 3822                                   | 66         |
| M6-10-1      | 11.5                         | 0.22       | 4154                                   | 55         | M6-12-12    | 10.13                        | 0.2        | 3620                                   | 91         |
| M6-10-2      | 11.3                         | 0.3        | 3976                                   | 68         | M6-12-13    | 10.42                        | 0.3        | 3700                                   | 110        |
|              |                              |            |                                        |            | M6-12-14    | 10.57                        | 0.23       | 3841                                   | 75         |
|              |                              |            |                                        |            | M6-12-15    | 10.64                        | 0.29       | 3820                                   | 100        |
|              |                              |            |                                        |            | M6-12-16    | 10.64                        | 0.17       | 3771                                   | 55         |
|              |                              |            |                                        |            | M6-12-17    | 10.41                        | 0.29       | 3570                                   | 110        |
|              |                              |            |                                        |            | M6-12-18    | 10.46                        | 0.2        | 3822                                   | 85         |
|              |                              |            |                                        |            | M6-12-19    | 10.57                        | 0.19       | 3775                                   | 78         |
| Average      | 10.97                        | 0.24       | 3840.39                                | 54.91      |             | 10.89                        | 0.23       | 3789.72                                | 76.62      |

**Table S3-1. Fission-track ages for monazite M6 from IGCEA-FT lab**

| Sample No. | Ns  | Area<br>(10 <sup>5</sup> cm <sup>2</sup> ) | $\rho_s$<br>(10 <sup>6</sup> cm <sup>-2</sup> ) | Dpc/Dpb<br>$\mu\text{m}$ | LA ICP MS             |            |                   |            | EMP                   |            |      |            |
|------------|-----|--------------------------------------------|-------------------------------------------------|--------------------------|-----------------------|------------|-------------------|------------|-----------------------|------------|------|------------|
|            |     |                                            |                                                 |                          | C <sub>U</sub> (μg/g) | $\sigma_U$ | Ages <sup>#</sup> | 1 $\sigma$ | C <sub>U</sub> (μg/g) | $\sigma_U$ | Ages | 1 $\sigma$ |
| M6-3-1     | 379 | 4.71                                       | 8.05                                            | 0.86                     | 3709                  | 59         | 3.88              | 0.36       | 3737                  | 98         | 3.86 | 0.37       |
| M6-3-2     | 635 | 7.81                                       | 8.13                                            | 0.87                     | 3709                  | 49         | 3.93              | 0.34       | 4249                  | 98         | 3.43 | 0.31       |
| M6-3-3     | 745 | 8.87                                       | 8.4                                             | 0.89                     | 3781                  | 54         | 3.98              | 0.34       | 3967                  | 99         | 3.79 | 0.34       |
| M6-3-4     | 526 | 6.73                                       | 7.82                                            | 0.89                     | 3751                  | 56         | 3.73              | 0.33       | 3473                  | 97         | 4.03 | 0.37       |
| M6-3-5     | 828 | 10.18                                      | 8.13                                            | 0.91                     | 3715                  | 50         | 3.91              | 0.33       | 3006                  | 96         | 4.84 | 0.44       |
| M6-4-1     | 565 | 8.32                                       | 6.79                                            | -                        | 3406                  | 49         | 3.57              | 0.32       | 4125                  | 98         | 2.95 | 0.27       |
| M6-4-2     | 375 | 5.67                                       | 6.61                                            | -                        | 3440                  | 51         | 3.44              | 0.32       | 3632                  | 97         | 3.26 | 0.31       |
| M6-4-3     | 392 | 6.36                                       | 6.17                                            | -                        | 3410                  | 50         | 3.24              | 0.3        | 3861                  | 97         | 2.86 | 0.27       |
| M6-4-4     | 267 | 4.36                                       | 6.12                                            | -                        | 3398                  | 50         | 3.23              | 0.32       | 3914                  | 98         | 2.8  | 0.28       |
| M6-4-5     | 406 | 5.85                                       | 6.93                                            | -                        | 3394                  | 43         | 3.66              | 0.34       | 3579                  | 97         | 3.47 | 0.33       |
| M6-5-1     | 514 | 7.4                                        | 6.94                                            | 0.82                     | 3549                  | 52         | 3.5               | 0.31       | 3314                  | 98         | 3.75 | 0.35       |
| M6-5-2     | 489 | 7.11                                       | 6.87                                            | 0.86                     | 3590                  | 57         | 3.43              | 0.31       | 4284                  | 99         | 2.88 | 0.26       |
| M6-5-3     | 587 | 7.78                                       | 7.55                                            | 0.9                      | 3568                  | 52         | 3.79              | 0.33       | 3808                  | 98         | 3.55 | 0.32       |
| M6-5-4     | 734 | 9.66                                       | 7.59                                            | 0.83                     | 3495                  | 55         | 3.89              | 0.34       | 3834                  | 98         | 3.55 | 0.32       |
| M6-5-5     | 490 | 5.98                                       | 8.19                                            | 0.86                     | 3520                  | 48         | 4.17              | 0.38       | 4099                  | 99         | 3.58 | 0.33       |
| M6-6-1     | 608 | 6.54                                       | 9.29                                            | 0.96                     | 4340                  | 59         | 3.84              | 0.34       | 3975                  | 98         | 4.19 | 0.38       |
| M6-6-2     | 827 | 8.77                                       | 9.43                                            | 0.92                     | 4278                  | 58         | 3.95              | 0.34       | 4407                  | 99         | 3.83 | 0.33       |
| M6-6-3     | 562 | 6.36                                       | 8.83                                            | 0.94                     | 3939                  | 51         | 4.02              | 0.36       | 4451                  | 99         | 3.56 | 0.32       |
| M6-6-4     | 340 | 4.5                                        | 7.55                                            | 0.86                     | 3859                  | 59         | 3.51              | 0.33       | 4637                  | 100        | 2.92 | 0.28       |
| M6-6-5     | 816 | 8.8                                        | 9.27                                            | 0.81                     | 4111                  | 65         | 4.04              | 0.35       | 4178                  | 99         | 3.97 | 0.35       |
| M6-6-6     | 885 | 9.38                                       | 9.43                                            | 0.81                     | 4050                  | 54         | 4.17              | 0.35       | 4839                  | 101        | 3.49 | 0.3        |
| M6-7-1     | 685 | 7                                          | 9.78                                            | 0.81                     | 4312                  | 59         | 4.06              | 0.35       | 4593                  | 96         | 3.82 | 0.34       |
| M6-7-2     | 592 | 6.01                                       | 9.85                                            | 0.83                     | 4266                  | 64         | 4.13              | 0.36       | 4020                  | 84         | 4.39 | 0.39       |
| M6-7-3     | 772 | 7.59                                       | 10.2                                            | 0.89                     | 4357                  | 56         | 4.18              | 0.36       | 4196                  | 88         | 4.34 | 0.38       |
| M6-7-4     | 960 | 9.26                                       | 10.4                                            | 0.82                     | 4332                  | 56         | 4.29              | 0.36       | 4187                  | 88         | 4.43 | 0.38       |
| M6-8-1     | 509 | 5.18                                       | 9.82                                            | 0.89                     | 3697                  | 40         | 4.76              | 0.42       | 4081                  | 85         | 4.31 | 0.39       |
| M6-8-2     | 679 | 7.56                                       | 8.98                                            | 0.89                     | 3805                  | 48         | 4.23              | 0.37       | 3658                  | 99         | 4.4  | 0.4        |
| M6-8-3     | 571 | 6.26                                       | 9.13                                            | 0.91                     | 3732                  | 55         | 4.38              | 0.39       | 4011                  | 99         | 4.07 | 0.37       |
| M6-8-4     | 571 | 6.13                                       | 9.32                                            | 0.91                     | 3663                  | 46         | 4.55              | 0.4        | 4002                  | 100        | 4.17 | 0.38       |
| M6-9-1     | 367 | 4.34                                       | 8.45                                            | 0.94                     | 4183                  | 66         | 3.62              | 0.34       | 4760                  | 100        | 3.18 | 0.3        |
| M6-9-2     | 503 | 5.31                                       | 9.47                                            | 0.92                     | 4244                  | 78         | 4                 | 0.36       | 4786                  | 100        | 3.54 | 0.32       |
| M6-10-1    | 429 | 4.6                                        | 9.32                                            | 0.9                      | 4154                  | 55         | 4.02              | 0.37       | 4099                  | 99         | 4.07 | 0.38       |
| M6-10-2    | 498 | 5.84                                       | 8.53                                            | 0.93                     | 3976                  | 68         | 3.84              | 0.35       | 4205                  | 101        | 3.63 | 0.33       |

**Table S3-2. Fission-track ages for monazite M6 from CAGS-FT lab**

| Sample No. | Ns  | Area<br>(10 <sup>5</sup> cm <sup>2</sup> ) | $\rho_s$<br>(10 <sup>6</sup> cm <sup>-2</sup> ) | LA ICP MS             |            |                   |            |
|------------|-----|--------------------------------------------|-------------------------------------------------|-----------------------|------------|-------------------|------------|
|            |     |                                            |                                                 | C <sub>U</sub> (μg/g) | $\sigma_U$ | Ages <sup>#</sup> | 1 $\sigma$ |
| M6-1-1     | 282 | 2.85                                       | 9.9                                             | 3864                  | 61         | 4.59              | 0.45       |
| M6-1-2     | 324 | 3.32                                       | 9.76                                            | 3812                  | 59         | 4.59              | 0.44       |
| M6-1-3     | 351 | 3.48                                       | 10.1                                            | 3862                  | 64         | 4.67              | 0.44       |
| M6-1-4     | 335 | 3.36                                       | 9.96                                            | 3890                  | 68         | 4.59              | 0.44       |
| M6-1-5     | 412 | 4.21                                       | 9.79                                            | 3828                  | 57         | 4.58              | 0.42       |
| M6-1-6     | 280 | 3.06                                       | 9.14                                            | 3891                  | 64         | 4.2               | 0.41       |
| M6-1-7     | 298 | 3.16                                       | 9.44                                            | 3886                  | 63         | 4.35              | 0.42       |
| M6-1-8     | 332 | 3.7                                        | 8.98                                            | 3899                  | 58         | 4.12              | 0.39       |
| M6-1-9     | 309 | 3.46                                       | 8.93                                            | 3894                  | 73         | 4.11              | 0.4        |
| M6-1-10    | 276 | 3.08                                       | 8.96                                            | 3818                  | 59         | 4.2               | 0.41       |
| M6-1-11    | 339 | 3.52                                       | 9.63                                            | 3889                  | 61         | 4.43              | 0.42       |
| M6-1-12    | 288 | 3.03                                       | 9.51                                            | 3911                  | 55         | 4.35              | 0.43       |
| M6-1-13    | 290 | 3.01                                       | 9.64                                            | 3923                  | 57         | 4.4               | 0.43       |
| M6-1-14    | 290 | 3.13                                       | 9.27                                            | 3906                  | 69         | 4.25              | 0.42       |
| M6-1-15    | 300 | 3.38                                       | 8.88                                            | 3909                  | 67         | 4.07              | 0.4        |
| M6-1-16    | 270 | 2.92                                       | 9.23                                            | 3827                  | 70         | 4.32              | 0.43       |
| M6-1-17    | 260 | 3.01                                       | 8.64                                            | 3802                  | 72         | 4.07              | 0.41       |
| M6-1-18    | 244 | 2.99                                       | 8.15                                            | 3865                  | 71         | 3.78              | 0.38       |
| M6-1-19    | 270 | 2.94                                       | 9.17                                            | 3856                  | 69         | 4.26              | 0.42       |
| M6-1-20    | 261 | 3.09                                       | 8.44                                            | 3791                  | 65         | 3.99              | 0.4        |
| M6-2-1     | 256 | 3.73                                       | 6.86                                            | 3460                  | 110        | 3.55              | 0.37       |
| M6-2-2     | 227 | 2.95                                       | 7.69                                            | 3680                  | 69         | 3.74              | 0.39       |
| M6-2-3     | 238 | 2.97                                       | 8.01                                            | 3760                  | 74         | 3.81              | 0.39       |
| M6-2-4     | 233 | 2.99                                       | 7.78                                            | 3683                  | 87         | 3.78              | 0.39       |
| M6-2-5     | 205 | 2.97                                       | 6.9                                             | 3644                  | 62         | 3.39              | 0.36       |
| M6-2-6     | 209 | 2.99                                       | 6.98                                            | 3656                  | 58         | 3.42              | 0.36       |
| M6-2-7     | 231 | 2.83                                       | 8.17                                            | 3562                  | 86         | 4.11              | 0.43       |
| M6-2-8     | 214 | 2.48                                       | 8.62                                            | 3800                  | 100        | 4.06              | 0.43       |
| M6-2-9     | 251 | 2.86                                       | 8.77                                            | 3840                  | 120        | 4.09              | 0.43       |
| M6-2-10    | 164 | 2.35                                       | 6.98                                            | 3650                  | 170        | 3.42              | 0.41       |
| M6-2-11    | 191 | 2.95                                       | 6.47                                            | 3822                  | 66         | 3.03              | 0.32       |
| M6-2-12    | 227 | 3.35                                       | 6.78                                            | 3620                  | 91         | 3.35              | 0.35       |
| M6-2-13    | 207 | 3.03                                       | 6.83                                            | 3700                  | 110        | 3.31              | 0.36       |
| M6-2-14    | 240 | 2.73                                       | 8.8                                             | 3841                  | 75         | 4.1               | 0.42       |
| M6-2-15    | 239 | 3                                          | 7.96                                            | 3820                  | 100        | 3.73              | 0.39       |
| M6-2-16    | 243 | 2.84                                       | 8.55                                            | 3771                  | 55         | 4.06              | 0.41       |
| M6-2-17    | 215 | 2.88                                       | 7.46                                            | 3570                  | 110        | 3.74              | 0.4        |
| M6-2-18    | 218 | 2.99                                       | 7.3                                             | 3822                  | 85         | 3.42              | 0.36       |
| M6-2-19    | 248 | 2.88                                       | 8.62                                            | 3775                  | 78         | 4.09              | 0.42       |

Table S3-3. Fission-track dating results for monazite M6 from CAS-FT lab

| No.     | Ns  | Area<br>(10 <sup>-8</sup> cm <sup>2</sup> ) | $\rho_s$<br>(10 <sup>6</sup> cm <sup>-2</sup> ) | LA ICP MS    |            | EPM               |            |              |            |      |            |
|---------|-----|---------------------------------------------|-------------------------------------------------|--------------|------------|-------------------|------------|--------------|------------|------|------------|
|         |     |                                             |                                                 | $C_U$ (µg/g) | $\sigma_U$ | Ages <sup>#</sup> | 1 $\sigma$ | $C_U$ (µg/g) | $\sigma_U$ | Ages | 1 $\sigma$ |
| M6-3-1  | 405 | 4.71                                        | 8.6                                             | 3709         | 59         | 4.15              | 0.38       | 3737         | 98         | 4.12 | 0.39       |
| M6-3-2  | 681 | 7.81                                        | 8.72                                            | 3709         | 49         | 4.21              | 0.37       | 4249         | 98         | 3.68 | 0.33       |
| M6-3-3  | 770 | 8.87                                        | 8.68                                            | 3781         | 54         | 4.11              | 0.35       | 3967         | 99         | 3.92 | 0.35       |
| M6-3-4  | 544 | 6.73                                        | 8.09                                            | 3751         | 56         | 3.86              | 0.34       | 3473         | 97         | 4.17 | 0.38       |
| M6-3-5  | 838 | 10.2                                        | 8.23                                            | 3715         | 50         | 3.97              | 0.34       | 3006         | 96         | 4.9  | 0.44       |
| M6-4-1  | 586 | 8.32                                        | 7.04                                            | 3406         | 49         | 3.7               | 0.33       | 4125         | 98         | 3.06 | 0.28       |
| M6-4-2  | 385 | 5.67                                        | 6.79                                            | 3440         | 51         | 3.53              | 0.33       | 3632         | 97         | 3.35 | 0.32       |
| M6-4-3  | 410 | 6.36                                        | 6.45                                            | 3410         | 50         | 3.39              | 0.31       | 3861         | 97         | 2.99 | 0.28       |
| M6-4-4  | 289 | 4.36                                        | 6.62                                            | 3398         | 50         | 3.49              | 0.34       | 3914         | 98         | 3.03 | 0.3        |
| M6-4-5  | 410 | 5.85                                        | 7                                               | 3394         | 43         | 3.69              | 0.34       | 3579         | 97         | 3.5  | 0.33       |
| M6-5-1  | 540 | 7.57                                        | 7.14                                            | 3549         | 52         | 3.6               | 0.32       | 3314         | 98         | 3.86 | 0.36       |
| M6-5-2  | 510 | 7.11                                        | 7.17                                            | 3590         | 57         | 3.58              | 0.32       | 4284         | 99         | 3    | 0.27       |
| M6-5-3  | 624 | 7.78                                        | 8.02                                            | 3568         | 52         | 4.03              | 0.35       | 3808         | 98         | 3.77 | 0.34       |
| M6-5-4  | 775 | 9.66                                        | 8.02                                            | 3495         | 55         | 4.11              | 0.35       | 3834         | 98         | 3.75 | 0.33       |
| M6-5-5  | 502 | 5.98                                        | 8.39                                            | 3520         | 48         | 4.27              | 0.38       | 4099         | 99         | 3.66 | 0.34       |
| M6-6-1  | 637 | 6.54                                        | 9.74                                            | 4340         | 59         | 4.02              | 0.35       | 3975         | 98         | 4.39 | 0.39       |
| M6-6-2  | 875 | 8.77                                        | 9.97                                            | 4278         | 58         | 4.17              | 0.35       | 4407         | 99         | 4.05 | 0.35       |
| M6-6-3  | 581 | 6.42                                        | 9.05                                            | 3939         | 51         | 4.11              | 0.36       | 4451         | 99         | 3.64 | 0.33       |
| M6-6-4  | 450 | 5.52                                        | 8.16                                            | 3859         | 59         | 3.78              | 0.35       | 4637         | 100        | 3.15 | 0.29       |
| M6-6-5  | 836 | 8.8                                         | 9.5                                             | 4111         | 65         | 4.14              | 0.35       | 4178         | 99         | 4.07 | 0.36       |
| M6-6-6  | 888 | 9.38                                        | 9.46                                            | 4050         | 54         | 4.18              | 0.35       | 4839         | 101        | 3.5  | 0.3        |
| MZ6-7-1 | 707 | 7                                           | 10.1                                            | 4312         | 59         | 4.19              | 0.36       | 4593         | 96         | 3.94 | 0.35       |
| MZ6-7-2 | 606 | 6.01                                        | 10.1                                            | 4266         | 64         | 4.23              | 0.37       | 4020         | 84         | 4.49 | 0.4        |
| MZ6-7-3 | 789 | 7.59                                        | 10.4                                            | 4357         | 56         | 4.27              | 0.37       | 4196         | 88         | 4.44 | 0.39       |
| MZ6-7-4 | 975 | 9.26                                        | 10.5                                            | 4332         | 56         | 4.35              | 0.37       | 4187         | 88         | 4.51 | 0.39       |
| M6-8-1  | 522 | 5.18                                        | 10.1                                            | 3697         | 40         | 4.88              | 0.43       | 4081         | 85         | 4.42 | 0.4        |
| M6-8-2  | 699 | 7.56                                        | 9.25                                            | 3805         | 48         | 4.35              | 0.38       | 3658         | 99         | 4.53 | 0.41       |
| M6-8-3  | 586 | 6.26                                        | 9.37                                            | 3732         | 55         | 4.49              | 0.4        | 4011         | 99         | 4.18 | 0.38       |
| M6-8-4  | 578 | 6.13                                        | 9.43                                            | 3663         | 46         | 4.61              | 0.41       | 4002         | 100        | 4.22 | 0.38       |
| M6-9-1  | 373 | 4.34                                        | 8.59                                            | 4183         | 66         | 3.68              | 0.35       | 4760         | 100        | 3.23 | 0.31       |
| M6-9-2  | 518 | 5.31                                        | 9.75                                            | 4244         | 78         | 4.12              | 0.37       | 4786         | 100        | 3.65 | 0.33       |
| M6-10-1 | 461 | 4.7                                         | 9.8                                             | 4154         | 55         | 4.23              | 0.38       | 4099         | 99         | 4.28 | 0.4        |
| M6-10-2 | 514 | 5.84                                        | 8.8                                             | 3976         | 68         | 3.96              | 0.36       | 4205         | 101        | 3.75 | 0.34       |

<sup>#</sup>Ages were calculated by using the absolute dating approach of HeFTy 2.1.7 (contact Richard A. Ketcham).
